# Supplementary material for: Disordered T cell-B cell interactions in autoantibody-positive inflammatory arthritis
Source: PubMed Central journal article supplement (PMC9849554; doi:10.3389/fimmu.2022.1068399), 2023-01-05
Supplement: DataSheet_1.pdf [file DataSheet_1.pdf]

## *Supplementary Material*

### **1 Supplementary Data**

#### **1.1 Supplemental File 1. Single cell transcriptomic analyses**

### **2 Supplementary Figures**

#### **2.1 Supplementary Figure 1. Flow cytometry gating strategy for T cell populations.**

(A) Representative dot plots depicting the flow cytometry gating strategy for Tph cells in oligo JIA PB and SF. (B) Representative flow cytometry dot plots depicting CXCR5 gating in Tph cells and Tregs from the SF of a patient with oligo JIA and PB of an adult control. CXCR5 gating was determined with the use of an FMO. (C) Representative dot plots depicting the flow cytometry gating strategy for Tph-like Tregs in the PB and SF of patients with oligo JIA. This sample was stimulated with CD3/CD28 Dynabeads to evaluate subsequent CXCL13 expression (Figure S2). Oligo JIA, oligoarticular juvenile idiopathic arthritis; PB, peripheral blood; SF, synovial fluid; Tph, T peripheral helper cell; FMO, fluorescence minus one;

#### **2.2 Supplementary Figure 2. CXCL13 and ICOS expression in oligo JIA T cells.**

(A) Representative dot plots gated on live CD3<sup>+</sup>CD4<sup>+</sup> T cells from oligo JIA PB and SF. (B) Representative dot plots gated on live Tregs from oligo JIA PB and SF. Oligo JIA, oligoarticular juvenile idiopathic arthritis; PB, peripheral blood; SF, synovial fluid.

#### **2.3 Supplementary Figure 3. Flow cytometry gating strategy for B cell populations.**

(A) Representative dot plots depicting the flow cytometry gating strategy for B cells in oligo JIA SF and adult control PB (B) Representative dot plots depicting the flow cytometry gating strategy for the read out from a T cell-B cell co-culture. Oligo JIA, oligoarticular juvenile idiopathic arthritis; PB, peripheral blood; SF, synovial fluid.

#### **2.4 Supplementary Figure 4. Single-cell transcriptomics studies of oligo JIA synovial fluid Teffs and Tregs.**

Combined data from two previously published datasets of oligo JIA SF Teff (CD4<sup>+</sup>CD25<sup>-</sup>) and Treg (CD4<sup>+</sup>CD127<sup>lo</sup>CD25<sup>+</sup>) cells studied with 10X Genomics.(34, 43) (A) UMAP of SF Teffs from 8 oligo JIA patients, split by ANA subgroup and color-coded by cluster. (B) Frequency of each cluster among total SF Teffs for each patient, contrasted by ANA subgroup. (C) UMAP of SF Teffs split between ANA<sup>-</sup> (9667 cells) and ANA<sup>+</sup> (7769 cells) groups, color-coded with their Tfh signature score.(42) (D) Top pathways identified in geneset enrichment analysis (GSEA) of SF Tph (Clusters 4 and 5) versus other SF Teffs (Clusters 1-3 and 6-10), ranked by normalized enrichment score (NES). (E) UMAP of SF Tregs split between ANA<sup>-</sup> (4550 cells) and ANA<sup>+</sup> (7606 cells) groups, color-coded with their induced Treg (iTreg) signature score.(68) SF, synovial fluid; ANA, antinuclear autoantibody; Teff, T effector cell; Tph, T peripheral helper cell; Tfh, T follicular helper cell; Treg, T regulatory cell; oligo JIA; oligoarticular juvenile idiopathic arthritis; UMAP, uniform manifold approximation and projection; TCR, T cell receptor.

### 3 Supplementary Tables

#### 3.1 Table S1. Clinical characteristics of the study participants and samples contributed to the studies.

| Subject  | Sample | Group   | Oligo JIA subtype |              | Sex  | Age (years) |             | Joint involvement |             | ANA | Uveitis | Treatment at sampling | Flow cytometry |      | Co-culture |
|----------|--------|---------|-------------------|--------------|------|-------------|-------------|-------------------|-------------|-----|---------|-----------------------|----------------|------|------------|
|          |        |         | at sampling       | end of study |      | at onset    | at sampling | at onset          | at sampling |     |         |                       | CD4            | CD19 |            |
| Adult 1* | PB     | Control | NA                | NA           | unk. | NA          | unknown     | NA                | NA          | NA  | NA      | NA                    | No             | Yes  | NA         |
| Adult 2* | PB     | Control | NA                | NA           | unk. | NA          | unknown     | NA                | NA          | NA  | NA      | NA                    | No             | Yes  | NA         |
| Adult 3  | PB     | Control | NA                | NA           | F    | NA          | 22          | NA                | NA          | NA  | NA      | NA                    | Yes            | Yes  | NA         |
| Adult 4  | PB     | Control | NA                | NA           | F    | NA          | 24-25       | NA                | NA          | NA  | NA      | NA                    | Yes            | No   | NA         |
| Adult 5  | PB     | Control | NA                | NA           | M    | NA          | 35-36       | NA                | NA          | NA  | NA      | NA                    | Yes            | Yes  | NA         |
| Adult 6  | PB     | Control | NA                | NA           | M    | NA          | 28          | NA                | NA          | NA  | NA      | NA                    | Yes            | No   | NA         |
| Adult 7  | PB     | Control | NA                | NA           | F    | NA          | 27-28       | NA                | NA          | NA  | NA      | NA                    | No             | Yes  | NA         |
| Adult 8  | PB     | Control | NA                | NA           | F    | NA          | 36-37       | NA                | NA          | NA  | NA      | NA                    | Yes            | No   | NA         |
| Adult 9  | PB     | Control | NA                | NA           | F    | NA          | 28-29       | NA                | NA          | NA  | NA      | NA                    | Yes            | No   | NA         |
| Adult 10 | PB     | Control | NA                | NA           | M    | NA          | 30-31       | NA                | NA          | NA  | NA      | NA                    | Yes            | No   | NA         |
| Adult 11 | PB     | Control | NA                | NA           | M    | NA          | 36-37       | NA                | NA          | NA  | NA      | NA                    | No             | Yes  | NA         |
| Pedi 1   | PB     | Control | NA                | NA           | F    | NA          | 11.5        | NA                | NA          | NA  | NA      | NA                    | Yes            | No   | NA         |
| Pedi 2   | PB     | Control | NA                | NA           | M    | NA          | 11          | NA                | NA          | NA  | NA      | NA                    | Yes            | No   | NA         |
| Pedi 3   | PB     | Control | NA                | NA           | F    | NA          | 6           | NA                | NA          | NA  | NA      | NA                    | Yes            | No   | NA         |
| Pedi 4   | PB     | Control | NA                | NA           | M    | NA          | 6.5         | NA                | NA          | NA  | NA      | NA                    | Yes            | No   | NA         |
| Pedi 5   | PB     | Control | NA                | NA           | M    | NA          | 7.5         | NA                | NA          | NA  | NA      | NA                    | Yes            | No   | NA         |
| JIA01*   | SF     | Oligo   | persistent        | persistent   | F    | 4.5         | 9           | 2                 | 1           | -   | Yes     | ADA                   | No             | No   | No         |

|        |        |       |            |            |   |     |      |   |   |   |     |      |     |     |     |
|--------|--------|-------|------------|------------|---|-----|------|---|---|---|-----|------|-----|-----|-----|
| JIA02* | SF     | Oligo | persistent | persistent | F | 2   | 4    | 1 | 1 | + | No  | ETA  | No  | Yes | Yes |
| JIA03  | SF     | Oligo | persistent | persistent | F | 3.5 | 9    | 1 | 1 | - | No  | None | Yes | No  | No  |
| JIA04  | SF     | Oligo | persistent | persistent | F | 10  | 13   | 1 | 1 | + | No  | MTX  | Yes | No  | No  |
| JIA04b | SF     | Oligo | persistent | persistent | F | 10  | 16   | 1 | 1 | + | No  | MTX  | Yes | Yes | Yes |
| JIA05  | PB, SF | Oligo | persistent | persistent | F | 5   | 9.5  | 1 | 1 | - | No  | LEF  | Yes | No  | No  |
| JIA06  | SF     | Oligo | new-onset  | persistent | F | 2.5 | 2.5  | 2 | 4 | + | No  | None | No  | Yes | Yes |
| JIA07  | SF     | Oligo | persistent | persistent | F | 5.5 | 6    | 1 | 1 | + | No  | None | No  | Yes | No  |
| JIA08  | PB, SF | Oligo | new-onset  | persistent | M | 2   | 2.5  | 3 | 3 | + | No  | None | Yes | No  | No  |
| JIA09  | PB, SF | Oligo | new-onset  | persistent | F | 4.5 | 4.5  | 3 | 3 | - | No  | None | Yes | Yes | No  |
| JIA10  | PB, SF | Oligo | new-onset  | persistent | F | 5   | 5    | 2 | 2 | - | No  | None | Yes | No  | No  |
| JIA11  | PB, SF | Oligo | new-onset  | unknown    | F | 11  | 11.5 | 1 | 1 | - | No  | None | Yes | Yes | No  |
| JIA12  | PB, SF | Oligo | new-onset  | persistent | F | 3   | 3    | 1 | 1 | + | No  | None | Yes | No  | No  |
| JIA13  | PB, SF | Oligo | new-onset  | persistent | F | 7.5 | 7.5  | 2 | 2 | - | No  | None | Yes | Yes | Yes |
| JIA14  | PB, SF | Oligo | new-onset  | persistent | M | 4   | 4    | 1 | 1 | - | No  | None | Yes | No  | No  |
| JIA15  | PB, SF | Oligo | new-onset  | persistent | F | 7.5 | 7.5  | 2 | 2 | + | No  | None | Yes | No  | No  |
| JIA16  | PB, SF | Oligo | persistent | persistent | F | 4   | 13   | 1 | 2 | + | No  | None | Yes | Yes | No  |
| JIA17  | SF     | Oligo | extended   | extended   | F | 6   | 14.5 | 1 | 1 | - | No  | None | Yes | Yes | No  |
| JIA18  | SF     | Oligo | persistent | persistent | M | 6   | 6.5  | 1 | 2 | - | No  | MTX  | Yes | No  | No  |
| JIA19  | SF     | Oligo | persistent | persistent | F | 6   | 17   | 3 | 2 | + | No  | None | Yes | No  | No  |
| JIA20  | SF     | Oligo | extended   | extended   | F | 7   | 20   | 1 | 1 | + | No  | ADA  | Yes | No  | No  |
| JIA21  | SF     | Oligo | extended   | extended   | F | 4   | 15   | 4 | 1 | + | Yes | None | Yes | Yes | No  |
| JIA22  | SF     | Oligo | persistent | persistent | F | 6   | 11.5 | 1 | 2 | - | No  | None | No  | Yes | No  |
| JIA23  | SF     | Oligo | persistent | persistent | F | 2   | 8    | 1 | 2 | - | Yes | None | Yes | Yes | Yes |
| JIA24  | PB, SF | Oligo | persistent | persistent | F | 2   | 2.5  | 2 | 3 | + | No  | MTX  | Yes | No  | No  |
| JIA25  | SF     | Oligo | new-onset  | undiff.    | F | 13  | 13   | 1 | 2 | + | No  | None | Yes | No  | No  |

Supplementary Material

|        |        |       |            |            |   |     |      |   |   |   |     |      |     |     |    |
|--------|--------|-------|------------|------------|---|-----|------|---|---|---|-----|------|-----|-----|----|
| JIA26  | SF     | Oligo | persistent | extended   | F | 2.5 | 10   | 1 | 1 | - | No  | None | Yes | No  | No |
| JIA26b | SF     | Oligo | persistent | extended   | F | 2.5 | 14.5 | 1 | 1 | - | No  | ETA  | Yes | Yes | No |
| JIA27  | SF     | Oligo | persistent | persistent | F | 3   | 9    | 2 | 2 | + | No  | MTX  | Yes | Yes | No |
| JIA28  | SF     | Oligo | persistent | persistent | F | 3.5 | 10   | 1 | 1 | - | Yes | MTX  | Yes | No  | No |
| JIA29  | PB, SF | Oligo | persistent | persistent | F | 4.5 | 8.5  | 1 | 2 | + | No  | None | Yes | No  | No |

•Leukopaks were obtained from 2 adult controls who donated to the blood bank at Boston Children’s Hospital. Per IRB policy, clinical characteristics of these patients (including age and sex) are not shared.

\*Sample included in prior 10X studies (see Julé et al., 2021) and considered in the present re-analysis.

NA, not applicable; PB, peripheral blood; SF, synovial fluid; Oligo, oligoarticular; JIA, juvenile idiopathic arthritis; F, female; M, male; ADA, adalimumab; ETA, etanercept; LEF, leflunomide; MTX, methotrexate; ANA, autonuclear antibodies; Undif, undifferentiated; unk, unknow

### 3.2 Table S2. Antibodies and dyes used in flow cytometry and functional studies.

| Antibody or dye           | Clone       | Manufacturer   | Reference  | Staining      | Panel                                     |
|---------------------------|-------------|----------------|------------|---------------|-------------------------------------------|
| anti-CD3-Alexa Fluor 700  | HIT3a       | BioLegend      | 300324     | Surface       | T cell (1) & (2)                          |
| anti-CD3-FITC             | OKT3        | BioLegend      | 317306     | Surface       | Sort                                      |
| anti-CD4-FITC             | RPA-T4      | BD Biosciences | 555346     | Surface       | T cell (1) & (2)                          |
| anti-CD4-PE/Cy7           | OKT4        | BioLegend      | 317414     | Surface       | Functional assay (sort)                   |
| anti-CD45RA-FITC          | HI100       | BioLegend      | 304106     | Surface       | Functional assay (sort)                   |
| anti-PD-1-APC             | EH12.2H7    | BioLegend      | 329907     | Surface       | T cell (1) & (2), Sort                    |
| anti-CXCR5-PerCP/Cy5.5    | J252D4      | BioLegend      | 356910     | Surface       | T cell (1) & (2)                          |
| anti-CXCR5-PE/eFluor610   | MU5UBEE     | eBioscience    | 61-9185-42 | Surface       | Functional assay (sort)                   |
| anti-CD127-PE/Cy7         | A019D5      | BioLegend      | 351320     | Surface       | T cell (1)                                |
| anti-CD25-BV605           | BC96        | eBioscience    | 302632     | Surface       | T cell (1)                                |
| anti-HLA-DR-BV605         | G46-6       | BD Biosciences | 562844     | Surface       | T cell (2)                                |
| anti-ICOS-APC/Cy7         | ISA-3       | eBioscience    | 47-9948-42 | Surface       | T cell (1)                                |
| anti-CD38-FITC            | HB-7        | BioLegend      | 356610     | Surface       | B cell                                    |
| anti-CD21-PE              | HB5         | eBioscience    | 12-0219-42 | Surface       | B cell                                    |
| anti-CD27-APC             | O323        | BioLegend      | 302810     | Surface       | B cell                                    |
| anti-CD27-APC/Cy7         | O323        | BioLegend      | 302816     | Surface       | Functional assay (sort & readout)         |
| anti-IgD-PerCP/eFluor710  | IA6-2       | eBioscience    | 46-9868-42 | Surface       | B cell, Functional assay (sort & readout) |
| anti-CD24-PE/Cy7          | SN3 A5-2H10 | eBioscience    | 25-0247-42 | Surface       | B cell                                    |
| anti-CD19-BV605           | HIB19       | BioLegend      | 302244     | Surface       | B cell, Functional assay (sort & readout) |
| anti-FOXP3- eFluor450     | PCH101      | Invitrogen     | 48-4776-42 | Intracellular | T cell (1)                                |
| anti-CXCL13-PE            | 53610       | Invitrogen     | MA5-23666  | Intracellular | T cell (1)                                |
| anti-IL-21-PE             | 3A3-N2      | BioLegend      | 513004     | Intracellular | T cell (2)                                |
| anti-IFN $\gamma$ -PE/Cy7 | 4S.B3       | BioLegend      | 502528     | Intracellular | T cell (2)                                |

Supplementary Material

|                                           |    |            |        |            |                            |
|-------------------------------------------|----|------------|--------|------------|----------------------------|
| LIVE/DEAD™ Fixable Yellow Dead Cell Stain | NA | Invitrogen | L34959 | Dead cells | T cell (1) & (2)           |
| 7-AAD                                     | NA | BioLegend  | 420404 | Dead cells | Functional assay (readout) |

The “T cell (1)” panel required overnight stimulation with CD3/CD28-coated beads for detection of CXCL13. For the “T cell (2)” panel, cells were stimulated with PMA/ionomycin for detection of cytokines. See Methods for details.
